# Supplementary material for: Insulin Resistance in Human iPS Cells Reduces Mitochondrial Size and Function
Source: PubMed Central journal article supplement (PMC4780029; doi:10.1038/srep22788), 2016-03-07
Supplement: srep22788-s1.pdf [file srep22788-s1.pdf]

## **Insulin Resistance in Human iPS Cells Reduces Mitochondrial Size and Function**

Alison M. Burkart, Kelly Tan, Laura Warren, Salvatore Iovino, Katelyn J. Hughes, C. Ronald Kahn, and Mary-Elizabeth Patti\*

Integrative Physiology and Metabolism Research Division, Joslin Diabetes Center and Harvard Medical School, Boston, MA, 02215, USA.

\*Correspondence:

Mary-Elizabeth Patti MD

1 Joslin Place, Boston, MA 02215

Phone: 617-309-1966

FAX: 617-309-2593

[Mary.Elizabeth.Patti@joslin.harvard.edu](mailto:Mary.Elizabeth.Patti@joslin.harvard.edu)

**Supplemental Information:** 5 Figures; 6 Tables

## Supplementary Figures

### Control

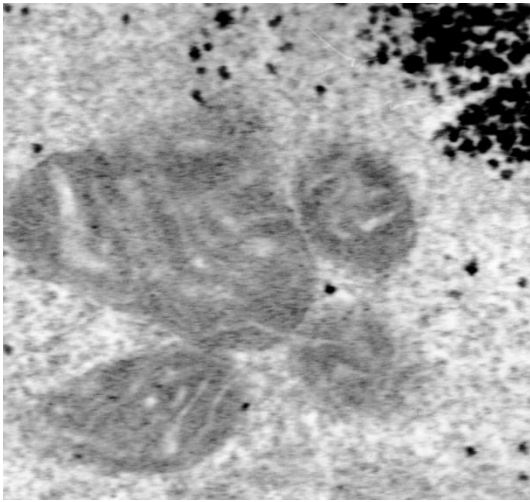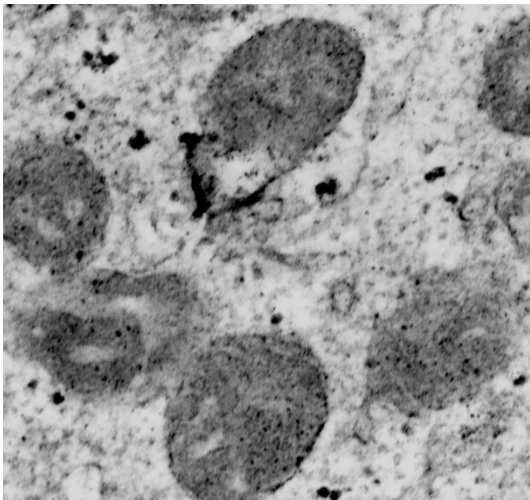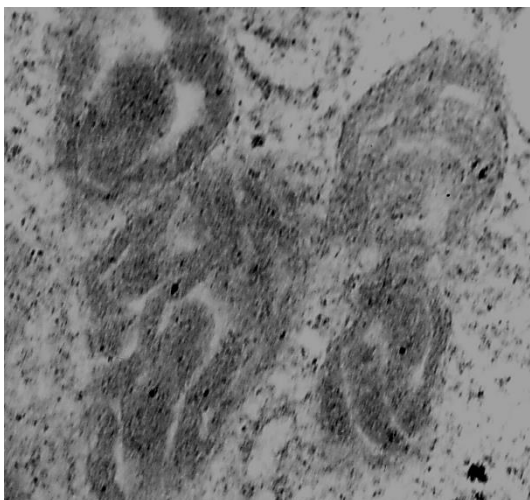

### IR-Mut

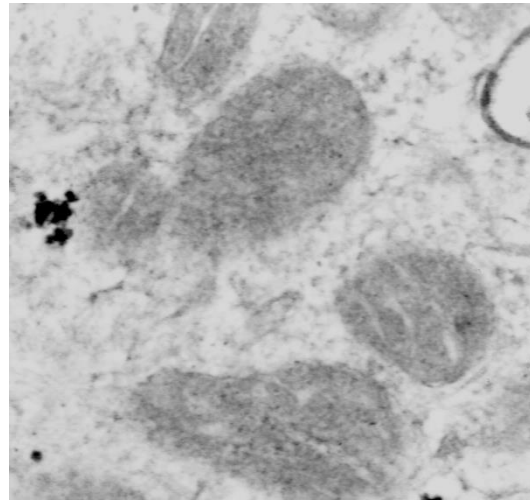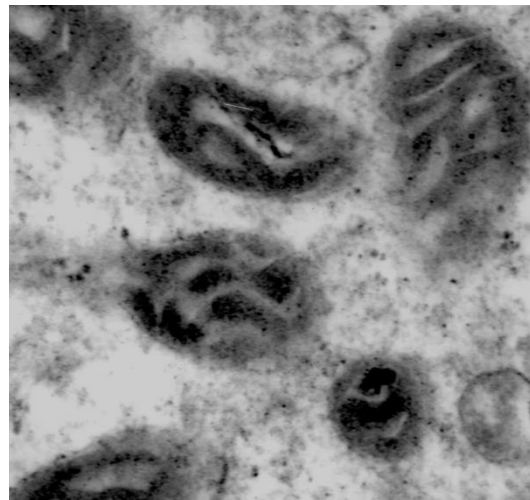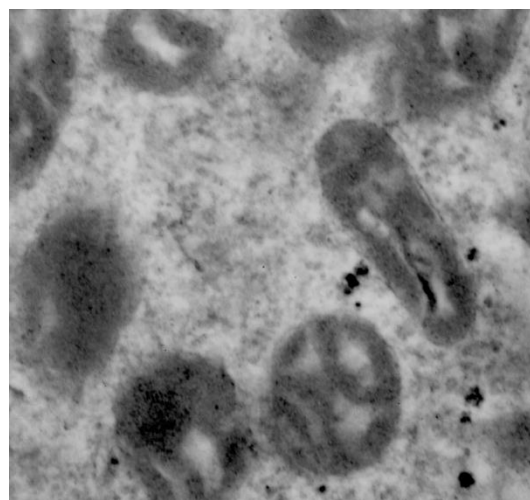

**Supplementary Figure S1: IR-Mut iPSC have smaller mitochondria.**  
Representative electron micrographs of control and IR-Mut iPSC (34000x).

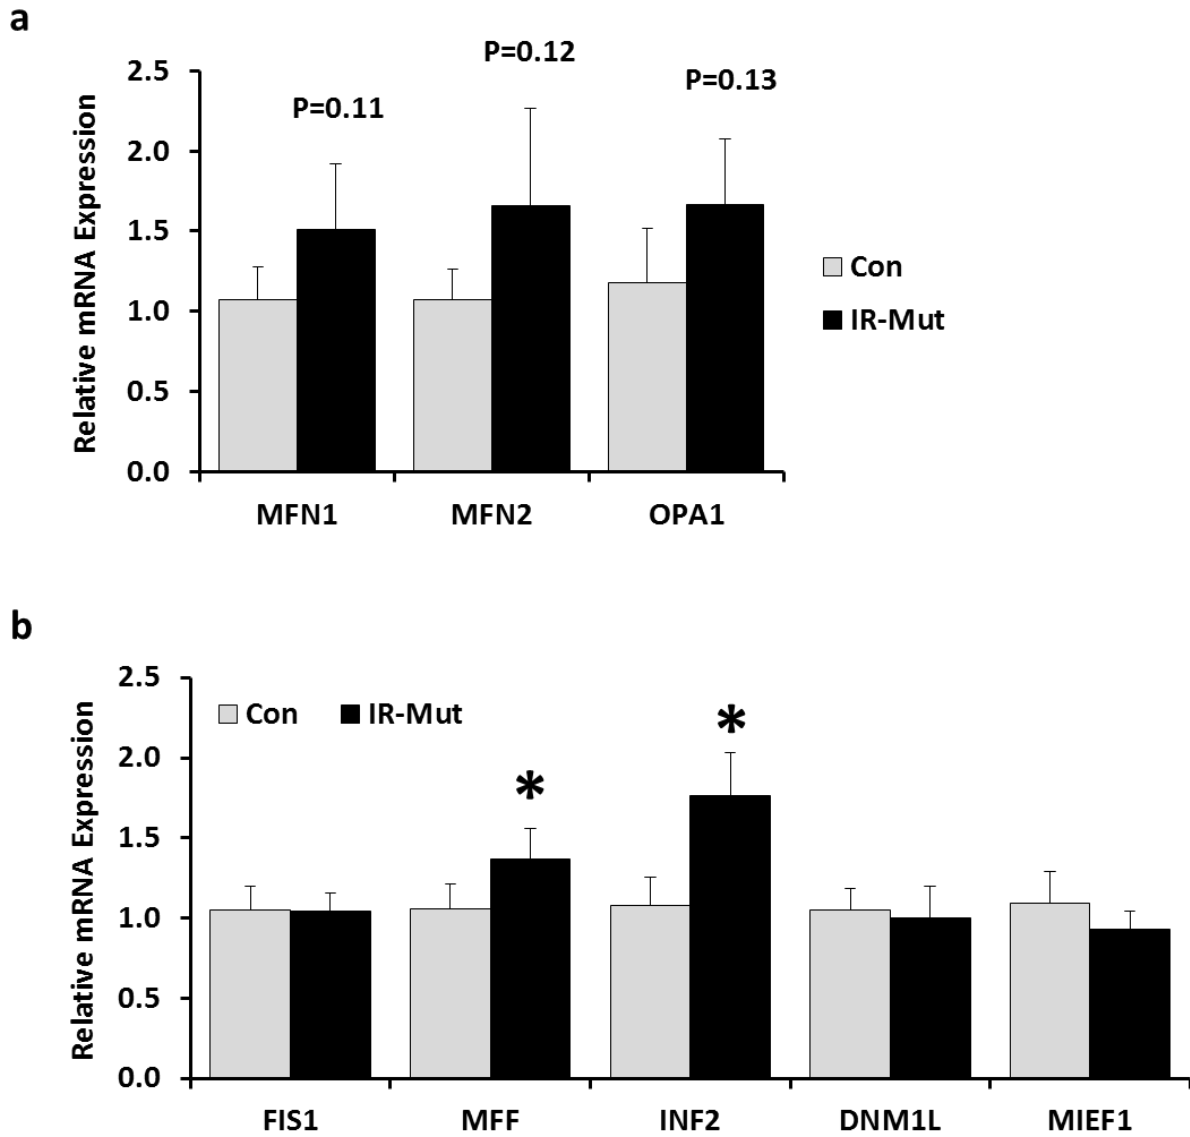

**Supplementary Figure S2: Genes regulating mitochondrial fission show increased expression in IR-Mut iPSC.**

Relative mRNA expression of proteins regulating mitochondrial fusion (A) and fission (B) dynamics, as assessed by qRT-PCR. Data are normalised to *36B4* and expressed relative to control (n=3). \* p<0.05 for IR-Mut vs. control.

**Control**

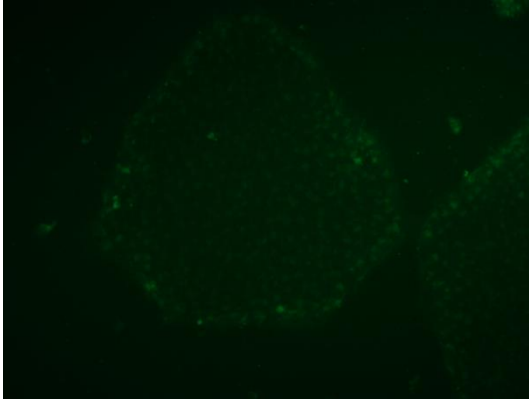

**IR-Mut**

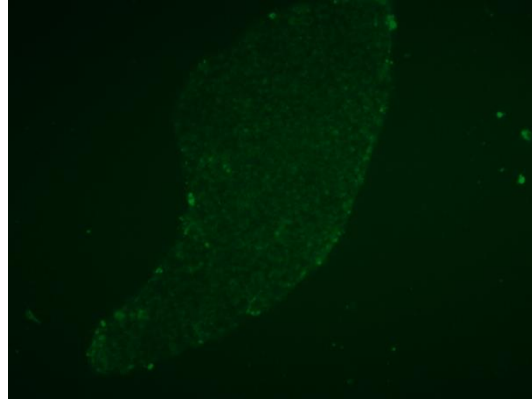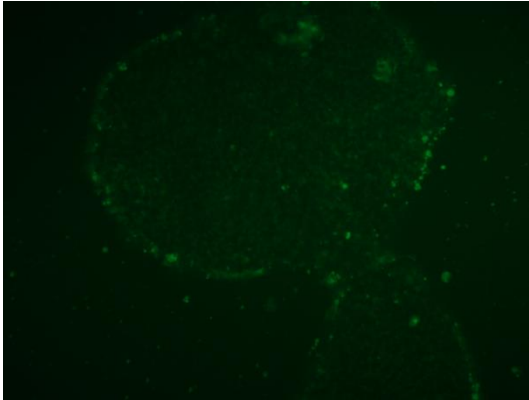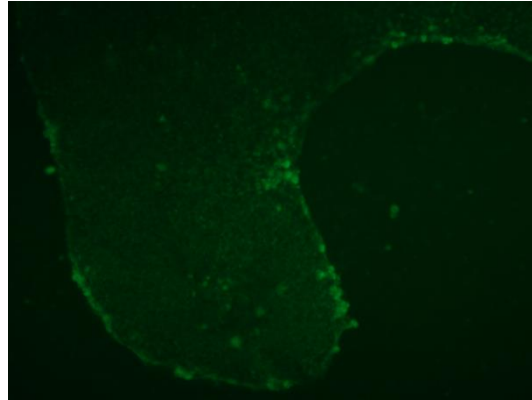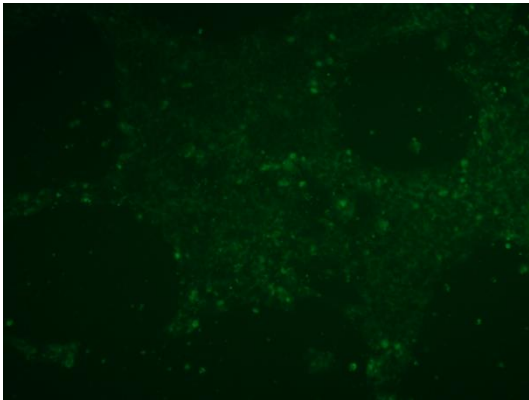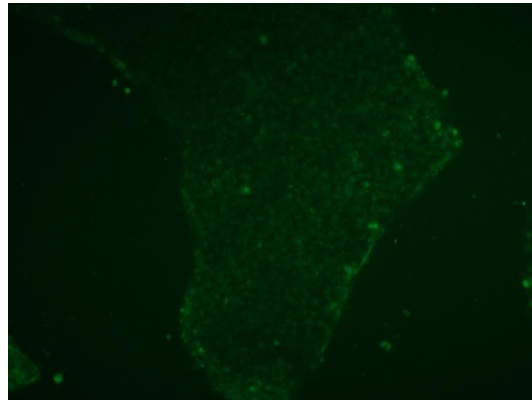

**Supplementary Figure S3: IR-Mut iPSC have similar mitochondrial mass to control iPSC.** MitoTracker Green staining of control and IR-Mut iPSC cells. Representative images are shown.

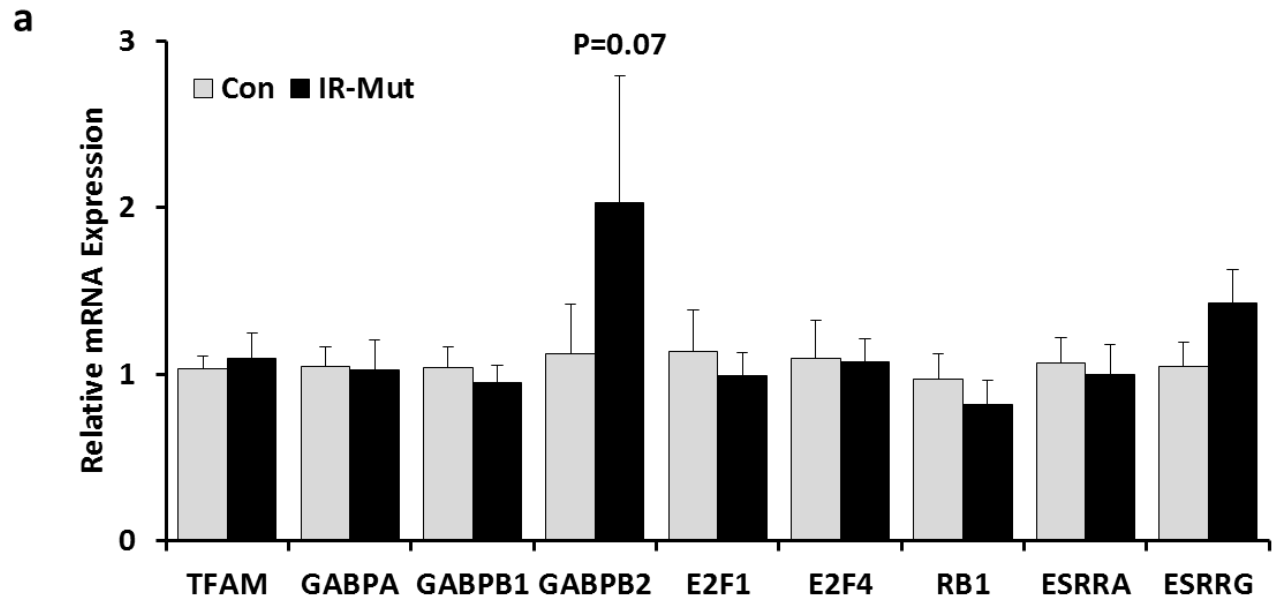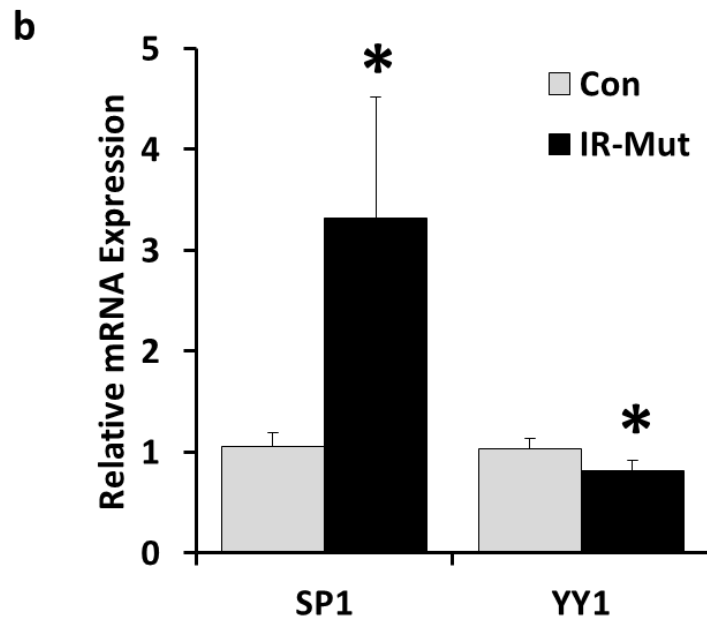

**Supplementary Figure S4: Transcriptional regulators SP1 and YY1 are altered in IR-Mut iPSC.**

A. Relative mRNA expression of transcriptional regulators of metabolism, as assessed by qRT-PCR. B. Relative mRNA expression of SP1 and YY1, as assessed by qRT-PCR. Data are normalised to *36B4* and expressed relative to control (n=3). \* p<0.05 for IR-Mut vs. control

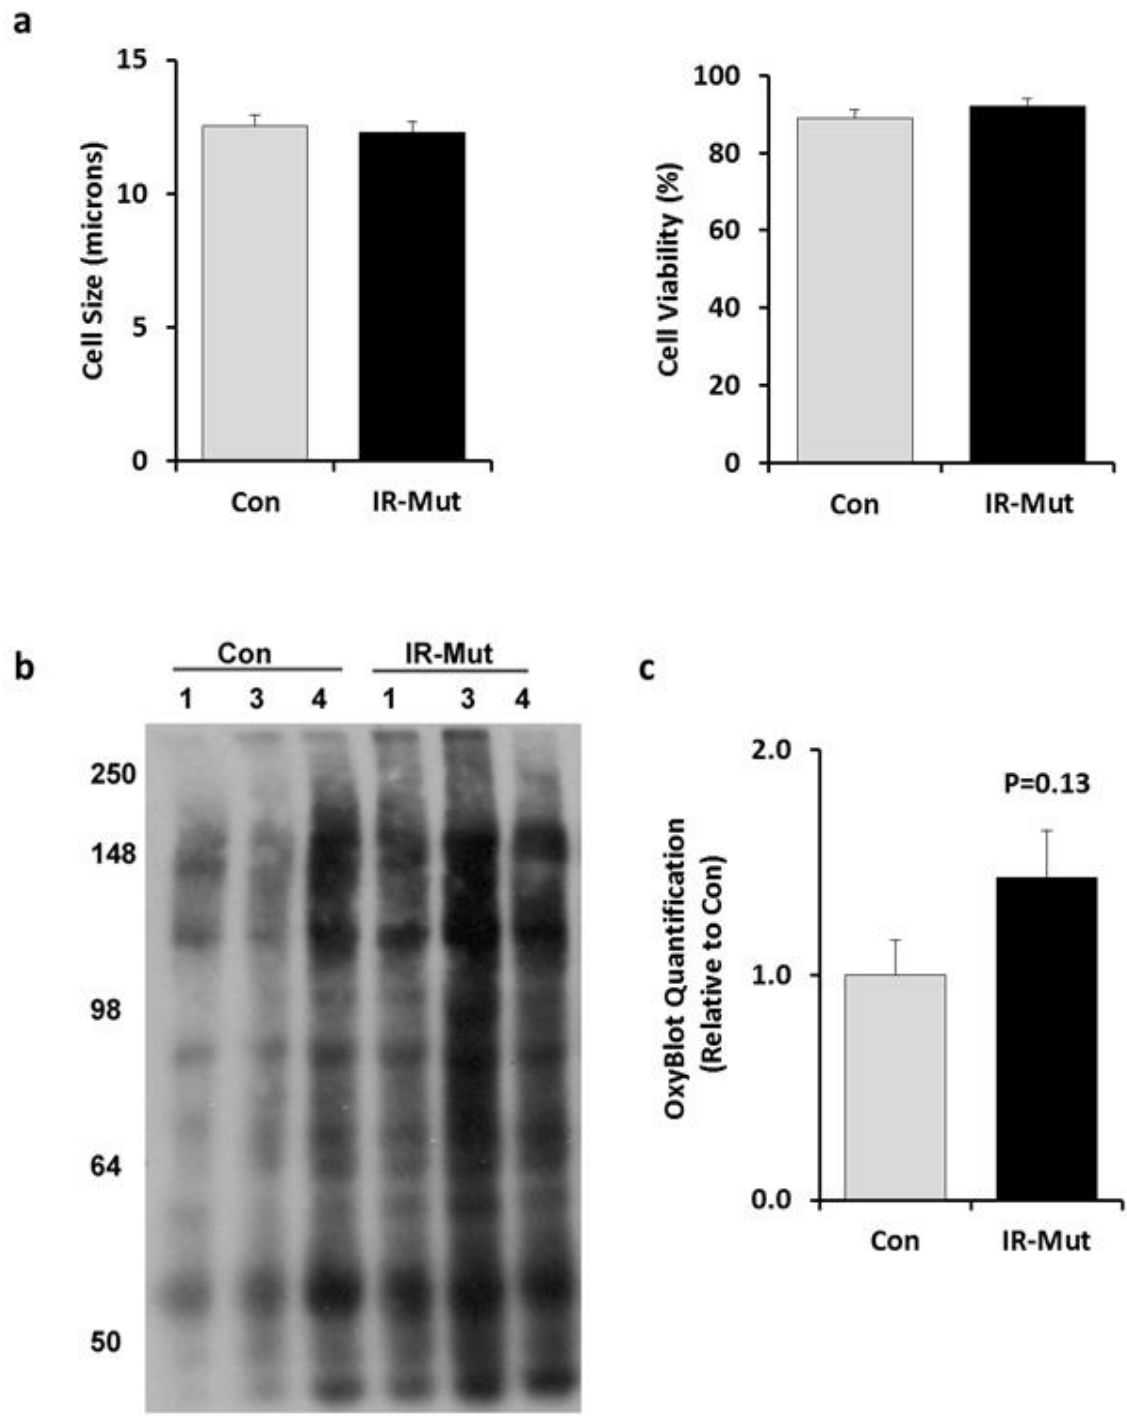

**Supplementary Figure S5: Tendency for increased protein oxidation in IR-Mut iPSC.**

A. Cell size (in microns) and viability based on trypan blue exclusion using Cellometer. B. Representative image of OxyBlot analysis. C. Quantification of OxyBlot analysis, expressed relative to control iPSC values.

## Supplementary Tables

**Supplementary Table S1: Clinical information for subjects, including sex, age, genotype, and clinical phenotype, with a summary of the signalling defects observed previously<sup>25</sup>.**

|         |         | Sex | Age      | Genotype                     | Phenotype                                                                                                                              | Signaling Defect                                                       |
|---------|---------|-----|----------|------------------------------|----------------------------------------------------------------------------------------------------------------------------------------|------------------------------------------------------------------------|
| Con1    | BJ      | M   | Newborn  | Normal                       | Healthy                                                                                                                                | None                                                                   |
| Con2    | GM05400 | M   | 6 years  | Normal                       | Healthy                                                                                                                                | None                                                                   |
| Con3    | GM00409 | M   | 7 years  | Normal                       | Healthy                                                                                                                                | None                                                                   |
| Con4    | GM00969 | F   | 2 years  | Normal                       | Healthy                                                                                                                                | None                                                                   |
| Con5    | GM00038 | F   | 9 years  | Normal                       | Healthy                                                                                                                                | None                                                                   |
| IR-Mut1 | Minn1   | F   | 1 month  | Exon 14<br>(nonsense; A897X) | Low birth weight; Insulin resistance;<br>Characteristic facial appearance; No<br>subcutaneous adipose tissue                           | INSR expression <10%,<br>INSR activation <50%<br>IGF1R activation 100% |
| IR-Mut2 | GM10277 | F   | 15 years | Exon 1<br>(missense; A2G)    | Pre- and post-natal growth retardation;<br>Microcephaly; Mental retardation;<br>Pachydermy; Severe insulin resistance                  | INSR expression 100%,<br>INSR activation <20%<br>IGF1R activation 100% |
| IR-Mut3 | GM20034 | M   | 2 months | Exon 3<br>(missense; L233P)  | Intrauterine growth restriction; no<br>subcutaneous adipose tissue; failure to<br>thrive                                               | INSR expression <5%,<br>INSR activation <5%<br>IGF1R activation 100%   |
| IR-Mut4 | GM20327 | F   | 2 months | Exon 2<br>(nonsense; E124X)  | Severe intrauterine growth restriction;<br>dysmorphic features; poor weight gain<br>after birth; hyperglycaemia; insulin<br>resistance | INSR expression <5%,<br>INSR activation <50%<br>IGF1R activation 100%  |

**Supplementary Table S2: Significantly altered genes (nominal p<0.05) associated with mitochondria based on gene ontology using the term “mitoc\*”.**

| ID            | Gene Symbol                       | Gene Title                                                                                                                                                                                                  | Log2 FC | P-Value |
|---------------|-----------------------------------|-------------------------------------------------------------------------------------------------------------------------------------------------------------------------------------------------------------|---------|---------|
| 11716302_s_at | ACSL1                             | acyl-CoA synthetase long-chain family member 1                                                                                                                                                              | -0.75   | 0.000   |
| 11758498_at   | DNM3                              | dynamamin 3                                                                                                                                                                                                 | -1.35   | 0.001   |
| 11724723_a_at | HSPA2                             | heat shock 70kDa protein 2                                                                                                                                                                                  | -0.96   | 0.001   |
| 11732524_a_at | CHKB-CPT1B<br>/// CPT1B           | choline kinase-like, carnitine palmitoyltransferase 1B (muscle)<br>transcription unit /// carnitine palmitoyltransferase 1B (muscle)                                                                        | 0.97    | 0.001   |
| 11733255_a_at | CHKB-CPT1B<br>/// CPT1B           | choline kinase-like, carnitine palmitoyltransferase 1B (muscle)<br>transcription unit /// carnitine palmitoyltransferase 1B (muscle)                                                                        | 0.86    | 0.001   |
| 11716824_s_at | BDH2                              | 3-hydroxybutyrate dehydrogenase, type 2                                                                                                                                                                     | 0.43    | 0.002   |
| 11755448_s_at | CAPRIN2                           | caprin family member 2                                                                                                                                                                                      | -0.53   | 0.002   |
| 11757085_s_at | ASAH2 ///<br>ASAH2B ///<br>ASAH2C | N-acylsphingosine amidohydrolase (non-lysosomal ceramidase) 2 /// N-<br>acylsphingosine amidohydrolase (non-lysosomal ceramidase) 2B /// N-<br>acylsphingosine amidohydrolase (non-lysosomal ceramidase) 2C | 0.44    | 0.002   |
| 11749782_x_at | BCAT1                             | branched chain amino-acid transaminase 1, cytosolic                                                                                                                                                         | 0.46    | 0.003   |
| 11722231_at   | PDP1                              | pyruvate dehydrogenase phosphatase catalytic subunit 1                                                                                                                                                      | -0.90   | 0.003   |
| 11761711_at   | FEZ1                              | fasciculation and elongation protein zeta 1 (zygin I)                                                                                                                                                       | 0.34    | 0.003   |
| 11721935_at   | DNAJC27                           | DnaJ (Hsp40) homolog, subfamily C, member 27                                                                                                                                                                | 0.39    | 0.003   |
| 11732360_a_at | CTPS2                             | CTP synthase II                                                                                                                                                                                             | 0.69    | 0.003   |
| 11760037_a_at | GLS                               | glutaminase                                                                                                                                                                                                 | -0.42   | 0.004   |
| 11750700_a_at | ACSL1                             | acyl-CoA synthetase long-chain family member 1                                                                                                                                                              | -0.47   | 0.004   |
| 11763202_x_at | FAM65B                            | family with sequence similarity 65, member B                                                                                                                                                                | -0.55   | 0.004   |
| 11722230_a_at | PDP1                              | pyruvate dehydrogenase phosphatase catalytic subunit 1                                                                                                                                                      | -0.71   | 0.004   |
| 11743104_at   | PTCD3                             | Pentatricopeptide repeat domain 3                                                                                                                                                                           | -0.41   | 0.004   |
| 11716707_a_at | ARL2BP                            | ADP-ribosylation factor-like 2 binding protein                                                                                                                                                              | 0.38    | 0.005   |
| 11756513_a_at | SFXN5                             | sideroflexin 5                                                                                                                                                                                              | 0.44    | 0.005   |
| 11724062_a_at | RAD51C                            | RAD51 homolog C ( <i>S. cerevisiae</i> )                                                                                                                                                                    | 0.76    | 0.005   |
| 11749895_a_at | BCAT1                             | branched chain amino-acid transaminase 1, cytosolic                                                                                                                                                         | 0.45    | 0.006   |
| 11749780_a_at | BCAT1                             | branched chain amino-acid transaminase 1, cytosolic                                                                                                                                                         | 0.44    | 0.006   |
| 11715477_at   | TFRC                              | transferrin receptor (p90, CD71)                                                                                                                                                                            | -0.40   | 0.007   |
| 11750293_a_at | RAD51C                            | RAD51 homolog C ( <i>S. cerevisiae</i> )                                                                                                                                                                    | 0.90    | 0.007   |
| 11732520_a_at | RAD51C                            | RAD51 homolog C ( <i>S. cerevisiae</i> )                                                                                                                                                                    | 0.86    | 0.007   |
| 11727797_at   | NDFIP2                            | Nedd4 family interacting protein 2                                                                                                                                                                          | -0.39   | 0.007   |
| 11762275_x_at | UQCRB                             | ubiquinol-cytochrome c reductase binding protein                                                                                                                                                            | 0.48    | 0.008   |
| 11761116_a_at | FAM65B                            | family with sequence similarity 65, member B                                                                                                                                                                | -0.53   | 0.008   |
| 11732575_a_at | FAM65B                            | family with sequence similarity 65, member B                                                                                                                                                                | -0.56   | 0.008   |
| 11721707_at   | GPAM                              | glycerol-3-phosphate acyltransferase, mitochondrial                                                                                                                                                         | 0.27    | 0.008   |
| 11751154_x_at | ALDOC                             | aldolase C, fructose-bisphosphate                                                                                                                                                                           | -0.47   | 0.008   |
| 11717297_at   | LRPPRC                            | leucine-rich PPR-motif containing                                                                                                                                                                           | -0.64   | 0.009   |
| 11751680_a_at | UQCRB                             | ubiquinol-cytochrome c reductase binding protein                                                                                                                                                            | 0.52    | 0.009   |
| 11723251_at   | RPS15A                            | ribosomal protein S15a                                                                                                                                                                                      | 0.42    | 0.009   |
| 11718765_a_at | NDUFA6                            | NADH dehydrogenase (ubiquinone) 1 alpha subcomplex, 6, 14kDa                                                                                                                                                | 0.26    | 0.010   |
| 11751064_a_at | EXO1                              | endo/exonuclease (5'-3'), endonuclease G-like                                                                                                                                                               | 0.40    | 0.010   |
| 11752103_a_at | HK1                               | hexokinase 1                                                                                                                                                                                                | -0.49   | 0.010   |
| 11721736_s_at | TNFRSF19                          | tumor necrosis factor receptor superfamily, member 19                                                                                                                                                       | 1.58    | 0.010   |



|               |                       |                                                                                                         |       |       |
|---------------|-----------------------|---------------------------------------------------------------------------------------------------------|-------|-------|
| 11723105_at   | CMPK2                 | cytidine monophosphate (UMP-CMP) kinase 2, mitochondrial                                                | 0.38  | 0.010 |
| 11725634_at   | MRPS25                | mitochondrial ribosomal protein S25                                                                     | 0.25  | 0.010 |
| 11756156_s_at | TFRC                  | transferrin receptor (p90, CD71)                                                                        | -0.39 | 0.011 |
| 11718291_a_at | HK1                   | hexokinase 1                                                                                            | -0.47 | 0.011 |
| 11763693_a_at | GLS                   | glutaminase                                                                                             | -0.28 | 0.011 |
| 11747314_a_at | PDP1                  | pyruvate dehydrogenase phosphatase catalytic subunit 1                                                  | -0.59 | 0.011 |
| 11751442_s_at | SLC25A44              | solute carrier family 25, member 44                                                                     | 0.33  | 0.011 |
| 11718213_a_at | SLC27A2               | solute carrier family 27 (fatty acid transporter), member 2                                             | 0.81  | 0.011 |
| 11730958_a_at | CHCHD4                | coiled-coil-helix-coiled-coil-helix domain containing 4                                                 | 0.32  | 0.011 |
| 11750890_a_at | MARS2                 | methionyl-tRNA synthetase 2, mitochondrial                                                              | -0.26 | 0.011 |
| 11749287_a_at | ARL2BP                | ADP-ribosylation factor-like 2 binding protein                                                          | 0.38  | 0.011 |
| 11757825_a_at | C7orf55 ///<br>LUC7L2 | chromosome 7 open reading frame 55 /// LUC7-like 2 ( <i>S. cerevisiae</i> )                             | 0.34  | 0.012 |
| 11727954_at   | PACS2                 | phosphofurin acidic cluster sorting protein 2                                                           | 0.35  | 0.012 |
| 11755807_a_at | DNA2                  | DNA replication helicase 2 homolog (yeast)                                                              | 0.27  | 0.013 |
| 11731491_a_at | HK1                   | hexokinase 1                                                                                            | -0.46 | 0.013 |
| 11763993_s_at | ATPAF1                | ATP synthase mitochondrial F1 complex assembly factor 1                                                 | 0.25  | 0.013 |
| 11750043_a_at | MTG1                  | mitochondrial GTPase 1 homolog ( <i>S. cerevisiae</i> )                                                 | 0.33  | 0.013 |
| 11749098_a_at | CAPRIN2               | caprin family member 2                                                                                  | -0.47 | 0.014 |
| 11736211_at   | MRP63                 | mitochondrial ribosomal protein 63                                                                      | 0.49  | 0.014 |
| 11726334_s_at | CRLS1                 | cardiolipin synthase 1                                                                                  | 0.39  | 0.014 |
| 11757304_s_at | ARL2BP                | ADP-ribosylation factor-like 2 binding protein                                                          | 0.32  | 0.014 |
| 11747079_x_at | ALDOC                 | aldolase C, fructose-bisphosphate                                                                       | -0.43 | 0.014 |
| 11730021_s_at | ACSM2A ///<br>ACSM2B  | acyl-CoA synthetase medium-chain family member 2A /// acyl-CoA synthetase medium-chain family member 2B | 0.29  | 0.014 |
| 11739877_x_at | BSG                   | basigin (Ok blood group)                                                                                | -0.50 | 0.014 |
| 11720180_at   | DDX28                 | DEAD (Asp-Glu-Ala-Asp) box polypeptide 28                                                               | 0.32  | 0.015 |
| 11756286_a_at | SFXN2                 | sideroflexin 2                                                                                          | 1.00  | 0.015 |
| 11728686_a_at | SFXN1                 | sideroflexin 1                                                                                          | 0.43  | 0.015 |
| 11739601_at   | AASS                  | aminoadipate-semialdehyde synthase                                                                      | -0.42 | 0.015 |
| 11721706_at   | GPAM                  | glycerol-3-phosphate acyltransferase, mitochondrial                                                     | 0.30  | 0.015 |
| 11744488_a_at | ACOT9                 | acyl-CoA thioesterase 9                                                                                 | -0.38 | 0.015 |
| 11763975_a_at | MRPS11                | mitochondrial ribosomal protein S11                                                                     | 0.30  | 0.016 |
| 11763320_x_at | GLS                   | glutaminase                                                                                             | -0.26 | 0.016 |
| 11739215_a_at | SLC25A23              | solute carrier family 25 (mitochondrial carrier; phosphate carrier), member 23                          | -0.24 | 0.016 |
| 11764001_x_at | MRPS11                | mitochondrial ribosomal protein S11                                                                     | 0.27  | 0.016 |
| 11718292_s_at | HK1                   | hexokinase 1                                                                                            | -0.44 | 0.016 |
| 11728687_at   | SFXN1                 | sideroflexin 1                                                                                          | 0.34  | 0.016 |
| 11724436_a_at | GABPB1                | GA binding protein transcription factor, beta subunit 1                                                 | 0.32  | 0.017 |
| 11723613_s_at | SERHL ///<br>SERHL2   | serine hydrolase-like /// serine hydrolase-like 2                                                       | 0.55  | 0.017 |
| 11763201_at   | FAM65B                | family with sequence similarity 65, member B                                                            | -0.45 | 0.017 |
| 11716047_a_at | C21orf33              | chromosome 21 open reading frame 33                                                                     | 0.30  | 0.017 |
| 11730738_a_at | SCCPDH                | saccharopine dehydrogenase (putative)                                                                   | 0.43  | 0.017 |
| 11722429_s_at | PPL                   | periplakin                                                                                              | -0.50 | 0.017 |
| 11741521_a_at | HAO2                  | hydroxyacid oxidase 2 (long chain)                                                                      | 0.27  | 0.018 |

|               |                   |                                                                                                              |       |       |
|---------------|-------------------|--------------------------------------------------------------------------------------------------------------|-------|-------|
| 11716757_a_at | DHX30             | DEAH (Asp-Glu-Ala-His) box polypeptide 30                                                                    | 0.30  | 0.018 |
| 11749781_s_at | BCAT1             | branched chain amino-acid transaminase 1, cytosolic                                                          | 0.35  | 0.018 |
| 11741670_x_at | ESR2              | estrogen receptor 2 (ER beta)                                                                                | -0.29 | 0.018 |
| 11743811_a_at | TFAM              | transcription factor A, mitochondrial                                                                        | 0.33  | 0.018 |
| 11760038_a_at | GLS               | glutaminase                                                                                                  | -0.26 | 0.018 |
| 11751153_a_at | ALDOC             | aldolase C, fructose-bisphosphate                                                                            | -0.35 | 0.018 |
| 11727324_at   | NAGS              | N-acetylglutamate synthase                                                                                   | -0.42 | 0.019 |
| 11729710_a_at | MARS2             | methionyl-tRNA synthetase 2, mitochondrial                                                                   | -0.26 | 0.019 |
| 11758535_s_at | GPAM              | glycerol-3-phosphate acyltransferase, mitochondrial                                                          | 0.28  | 0.019 |
| 11751388_a_at | FEN1              | flap structure-specific endonuclease 1                                                                       | 0.27  | 0.019 |
| 11755241_a_at | AASS              | aminoadipate-semialdehyde synthase                                                                           | -0.50 | 0.019 |
| 11730156_a_at | WWOX              | WW domain containing oxidoreductase                                                                          | 0.80  | 0.019 |
| 11758921_x_at | MRPS17            | mitochondrial ribosomal protein S17                                                                          | 0.25  | 0.019 |
| 11741148_a_at | PRDX2             | peroxiredoxin 2                                                                                              | 0.37  | 0.020 |
| 11715734_a_at | NIPSNAP1          | nipsnap homolog 1 (C. elegans)                                                                               | 0.38  | 0.020 |
| 11724057_a_at | AADAT             | aminoadipate aminotransferase                                                                                | 0.42  | 0.020 |
| 11751676_x_at | AK2               | adenylate kinase 2                                                                                           | 0.34  | 0.021 |
| 11720140_at   | RILP              | Rab interacting lysosomal protein                                                                            | -0.36 | 0.021 |
| 11724462_x_at | ALDOC             | aldolase C, fructose-bisphosphate                                                                            | -0.43 | 0.021 |
| 11717498_a_at | SLC25A36          | solute carrier family 25, member 36                                                                          | -0.22 | 0.022 |
| 11718571_at   | NT5DC3            | 5'-nucleotidase domain containing 3                                                                          | -0.38 | 0.022 |
| 11741402_a_at | C21orf33          | chromosome 21 open reading frame 33                                                                          | 0.35  | 0.022 |
| 11739911_at   | PCBD2             | pterin-4 alpha-carbinolamine dehydratase/dimerization cofactor of hepatocyte nuclear factor 1 alpha (TCF1) 2 | 0.42  | 0.022 |
| 11759535_at   | MRPS12            | mitochondrial ribosomal protein S12                                                                          | 0.30  | 0.022 |
| 11736193_a_at | RRM2B             | ribonucleotide reductase M2 B (TP53 inducible)                                                               | -0.49 | 0.022 |
| 11762245_a_at | RMND1             | required for meiotic nuclear division 1 homolog (S. cerevisiae)                                              | 0.39  | 0.023 |
| 11758157_s_at | COQ10B            | coenzyme Q10 homolog B (S. cerevisiae)                                                                       | -0.28 | 0.023 |
| 11736192_at   | RRM2B             | ribonucleotide reductase M2 B (TP53 inducible)                                                               | -0.41 | 0.023 |
| 11745216_s_at | KBTBD4 /// PTPMT1 | kelch repeat and BTB (POZ) domain containing 4 /// protein tyrosine phosphatase, mitochondrial 1             | 0.33  | 0.023 |
| 11751732_x_at | FAM136A           | family with sequence similarity 136, member A                                                                | 0.43  | 0.023 |
| 11746069_a_at | GATM              | glycine amidinotransferase (L-arginine:glycine amidinotransferase)                                           | -0.59 | 0.023 |
| 11750960_a_at | AASS              | aminoadipate-semialdehyde synthase                                                                           | -0.48 | 0.024 |
| 11760397_at   | SARS2             | seryl-tRNA synthetase 2, mitochondrial                                                                       | 0.22  | 0.024 |
| 11730931_at   | ACSS3             | acyl-CoA synthetase short-chain family member 3                                                              | 0.34  | 0.024 |
| 11729539_a_at | IMMP1L            | IMP1 inner mitochondrial membrane peptidase-like (S. cerevisiae)                                             | 0.25  | 0.025 |
| 11724461_a_at | ALDOC             | aldolase C, fructose-bisphosphate                                                                            | -0.47 | 0.025 |
| 11746563_x_at | FAM65A            | family with sequence similarity 65, member A                                                                 | -0.57 | 0.025 |
| 11756498_a_at | GLS2              | glutaminase 2 (liver, mitochondrial)                                                                         | -0.42 | 0.025 |
| 11728816_at   | AARS2             | alanyl-tRNA synthetase 2, mitochondrial (putative)                                                           | 0.33  | 0.025 |
| 11759022_s_at | ELK3              | ELK3, ETS-domain protein (SRF accessory protein 2)                                                           | -0.37 | 0.026 |
| 11720547_a_at | PDSS1             | prenyl (decaprenyl) diphosphate synthase, subunit 1                                                          | 0.39  | 0.026 |
| 11744689_x_at | ARMC10            | armadillo repeat containing 10                                                                               | 0.68  | 0.027 |
| 11733969_a_at | SHMT1             | serine hydroxymethyltransferase 1 (soluble)                                                                  | 0.39  | 0.027 |
| 11725721_a_at | MRM1              | mitochondrial rRNA methyltransferase 1 homolog (S. cerevisiae)                                               | 0.33  | 0.028 |
| 11736212_x_at | MRP63             | mitochondrial ribosomal protein 63                                                                           | 0.47  | 0.028 |

|               |                                  |                                                                                                                                                                                                                            |       |       |
|---------------|----------------------------------|----------------------------------------------------------------------------------------------------------------------------------------------------------------------------------------------------------------------------|-------|-------|
| 11755458_a_at | HDCC2                            | HD domain containing 2                                                                                                                                                                                                     | 0.28  | 0.029 |
| 11740522_a_at | TPO                              | thyroid peroxidase                                                                                                                                                                                                         | -0.23 | 0.029 |
| 11727323_a_at | NAGS                             | N-acetylglutamate synthase                                                                                                                                                                                                 | -0.30 | 0.029 |
| 11724783_a_at | MRPS18C                          | mitochondrial ribosomal protein S18C                                                                                                                                                                                       | 0.28  | 0.029 |
| 11755090_a_at | MTG1                             | mitochondrial GTPase 1 homolog (S. cerevisiae)                                                                                                                                                                             | 0.29  | 0.029 |
| 11721934_at   | DNAJC27                          | DnaJ (Hsp40) homolog, subfamily C, member 27                                                                                                                                                                               | 0.33  | 0.029 |
| 11761147_at   | TYMP                             | thymidine phosphorylase                                                                                                                                                                                                    | -0.35 | 0.029 |
| 11756474_a_at | CPT1A                            | carnitine palmitoyltransferase 1A (liver)                                                                                                                                                                                  | -0.51 | 0.030 |
| 11728428_a_at | CCDC136                          | coiled-coil domain containing 136                                                                                                                                                                                          | -0.27 | 0.030 |
| 11718045_s_at | RAB11B                           | RAB11B, member RAS oncogene family                                                                                                                                                                                         | 0.27  | 0.030 |
| 11715771_a_at | MRPL13                           | mitochondrial ribosomal protein L13                                                                                                                                                                                        | 0.24  | 0.031 |
| 11739876_s_at | BSG                              | basigin (Ok blood group)                                                                                                                                                                                                   | -0.47 | 0.031 |
| 11725521_x_at | GLUL                             | glutamate-ammonia ligase                                                                                                                                                                                                   | -0.24 | 0.031 |
| 11737897_a_at | ABCB7                            | ATP-binding cassette, sub-family B (MDR/TAP), member 7                                                                                                                                                                     | -0.29 | 0.032 |
| 11717907_x_at | FAM136A                          | family with sequence similarity 136, member A                                                                                                                                                                              | 0.41  | 0.032 |
| 11744148_at   | MRPL12                           | mitochondrial ribosomal protein L12                                                                                                                                                                                        | 0.21  | 0.032 |
| 11758920_at   | MRPS17                           | mitochondrial ribosomal protein S17                                                                                                                                                                                        | 0.22  | 0.032 |
| 11719921_s_at | GM2A                             | GM2 ganglioside activator                                                                                                                                                                                                  | -0.39 | 0.032 |
| 11729280_a_at | FAM175A                          | family with sequence similarity 175, member A                                                                                                                                                                              | -0.41 | 0.032 |
| 11744999_a_at | TXNRD2                           | thioredoxin reductase 2                                                                                                                                                                                                    | -0.92 | 0.032 |
| 11761271_x_at | CARS2                            | cysteinyI-tRNA synthetase 2, mitochondrial (putative)                                                                                                                                                                      | 0.35  | 0.033 |
| 11736507_s_at | FRMD6                            | FERM domain containing 6                                                                                                                                                                                                   | -0.60 | 0.033 |
| 11747153_x_at | ACOT9                            | acyl-CoA thioesterase 9                                                                                                                                                                                                    | -0.31 | 0.033 |
| 11734305_a_at | LACTB                            | lactamase, beta                                                                                                                                                                                                            | -0.73 | 0.033 |
| 11736821_x_at | TP73                             | tumor protein p73                                                                                                                                                                                                          | -0.24 | 0.034 |
| 11761243_at   | CARKD                            | carbohydrate kinase domain containing                                                                                                                                                                                      | 0.22  | 0.034 |
| 11738159_x_at | COX6B2                           | cytochrome c oxidase subunit VIb polypeptide 2 (testis)                                                                                                                                                                    | -0.32 | 0.034 |
| 11727779_at   | GHITM                            | growth hormone inducible transmembrane protein                                                                                                                                                                             | 0.32  | 0.034 |
| 11723466_a_at | MRPS11                           | mitochondrial ribosomal protein S11                                                                                                                                                                                        | 0.25  | 0.034 |
| 11735706_a_at | BSG                              | basigin (Ok blood group)                                                                                                                                                                                                   | -0.45 | 0.034 |
| 11725052_a_at | TOP1MT                           | topoisomerase (DNA) I, mitochondrial                                                                                                                                                                                       | -0.35 | 0.034 |
| 11722603_at   | NEFH                             | neurofilament, heavy polypeptide                                                                                                                                                                                           | -0.60 | 0.035 |
| 11716774_a_at | RAI14                            | retinoic acid induced 14                                                                                                                                                                                                   | -0.56 | 0.035 |
| 11745462_a_at | PRDX2                            | peroxiredoxin 2                                                                                                                                                                                                            | 0.28  | 0.035 |
| 11720329_at   | RNMTL1                           | RNA methyltransferase like 1                                                                                                                                                                                               | 0.27  | 0.035 |
| 11747729_s_at | SDHA ///<br>SDHAP1 ///<br>SDHAP2 | succinate dehydrogenase complex, subunit A, flavoprotein (Fp) ///<br>succinate dehydrogenase complex, subunit A, flavoprotein pseudogene 1<br>/// succinate dehydrogenase complex, subunit A, flavoprotein<br>pseudogene 2 | -0.47 | 0.035 |
| 11762158_at   | PPA2                             | pyrophosphatase (inorganic) 2                                                                                                                                                                                              | -0.47 | 0.035 |
| 11736213_at   | MRP63                            | mitochondrial ribosomal protein 63                                                                                                                                                                                         | 0.23  | 0.036 |
| 11758127_s_at | CHCHD2                           | coiled-coil-helix-coiled-coil-helix domain containing 2                                                                                                                                                                    | 1.17  | 0.037 |
| 11718686_x_at | TXNRD2                           | thioredoxin reductase 2                                                                                                                                                                                                    | -0.75 | 0.037 |
| 11730224_a_at | POLDIP2                          | polymerase (DNA-directed), delta interacting protein 2                                                                                                                                                                     | 0.31  | 0.038 |
| 11759049_at   | ACSS3                            | acyl-CoA synthetase short-chain family member 3                                                                                                                                                                            | 0.31  | 0.038 |
| 11752949_a_at | COX6B2                           | cytochrome c oxidase subunit VIb polypeptide 2 (testis)                                                                                                                                                                    | -0.27 | 0.038 |
| 11744708_a_at | LYRM1                            | LYR motif containing 1                                                                                                                                                                                                     | 0.23  | 0.038 |

|               |              |                                                                                 |       |       |
|---------------|--------------|---------------------------------------------------------------------------------|-------|-------|
| 11724303_a_at | COG8 /// PDF | component of oligomeric golgi complex 8 /// peptide deformylase (mitochondrial) | 0.35  | 0.039 |
| 11745000_x_at | TXNRD2       | thioredoxin reductase 2                                                         | -0.90 | 0.039 |
| 11758099_x_at | CHCHD2       | coiled-coil-helix-coiled-coil-helix domain containing 2                         | 1.13  | 0.039 |
| 11717264_a_at | ATPAF1       | ATP synthase mitochondrial F1 complex assembly factor 1                         | 0.21  | 0.039 |
| 11722469_a_at | ACSL6        | acyl-CoA synthetase long-chain family member 6                                  | -0.28 | 0.039 |
| 11756596_a_at | PDPR         | pyruvate dehydrogenase phosphatase regulatory subunit                           | 0.27  | 0.039 |
| 11720643_a_at | IVD          | isovaleryl-CoA dehydrogenase                                                    | 0.70  | 0.039 |
| 11753575_at   | COQ7         | coenzyme Q7 homolog, ubiquinone (yeast)                                         | 0.28  | 0.039 |
| 11751389_s_at | FEN1         | flap structure-specific endonuclease 1                                          | 0.24  | 0.039 |
| 11744474_s_at | IDI1         | isopentenyl-diphosphate delta isomerase 1                                       | -0.29 | 0.040 |
| 11716484_at   | UNC119B      | unc-119 homolog B (C. elegans)                                                  | 0.26  | 0.040 |
| 11720744_a_at | CROT         | carnitine O-octanoyltransferase                                                 | -0.28 | 0.040 |
| 11729711_at   | MARS2        | methionyl-tRNA synthetase 2, mitochondrial                                      | -0.19 | 0.041 |
| 11730406_a_at | PAK7         | p21 protein (Cdc42/Rac)-activated kinase 7                                      | -0.30 | 0.041 |
| 11717430_s_at | COX7A1       | cytochrome c oxidase subunit VIIa polypeptide 1 (muscle)                        | -0.92 | 0.041 |
| 11723438_s_at | AK3          | adenylate kinase 3                                                              | -0.43 | 0.041 |
| 11716670_s_at | RAB1B        | RAB1B, member RAS oncogene family                                               | 0.21  | 0.041 |
| 11721387_at   | LACTB        | lactamase, beta                                                                 | -0.70 | 0.041 |
| 11750128_s_at | IMMT         | inner membrane protein, mitochondrial                                           | 0.26  | 0.042 |
| 11747631_x_at | XAF1         | XIAP associated factor 1                                                        | 0.23  | 0.042 |
| 11728248_a_at | TSFM         | Ts translation elongation factor, mitochondrial                                 | 0.22  | 0.042 |
| 11754177_a_at | RRM2B        | ribonucleotide reductase M2 B (TP53 inducible)                                  | -0.36 | 0.043 |
| 11761093_at   | DHRS4        | Dehydrogenase/reductase (SDR family) member 4                                   | 0.23  | 0.043 |
| 11718044_s_at | RAB11B       | RAB11B, member RAS oncogene family                                              | 0.23  | 0.044 |
| 11715409_a_at | PRDX2        | peroxiredoxin 2                                                                 | 0.29  | 0.044 |
| 11748857_a_at | AK3          | adenylate kinase 3                                                              | -0.38 | 0.045 |
| 11715410_x_at | PRDX2        | peroxiredoxin 2                                                                 | 0.30  | 0.045 |
| 11745463_x_at | PRDX2        | peroxiredoxin 2                                                                 | 0.30  | 0.045 |
| 11724381_at   | FAM65B       | family with sequence similarity 65, member B                                    | -0.75 | 0.045 |
| 11748014_s_at | VDAC3        | voltage-dependent anion channel 3                                               | 0.19  | 0.046 |
| 11739875_a_at | BSG          | basigin (OK blood group)                                                        | -0.40 | 0.046 |
| 11734655_x_at | ATP5F1       | ATP synthase, H+ transporting, mitochondrial Fo complex, subunit B1             | 0.38  | 0.046 |
| 11739383_a_at | IDI1         | isopentenyl-diphosphate delta isomerase 1                                       | -0.30 | 0.046 |
| 11757814_s_at | SLC25A30     | solute carrier family 25, member 30                                             | -0.41 | 0.046 |
| 11718418_a_at | TST          | thiosulfate sulfurtransferase (rhodanese)                                       | 0.43  | 0.047 |
| 11754083_a_at | BSG          | basigin (OK blood group)                                                        | -0.41 | 0.047 |
| 11740020_at   | OTC          | ornithine carbamoyltransferase                                                  | 0.21  | 0.047 |
| 11727393_a_at | COX15        | COX15 homolog, cytochrome c oxidase assembly protein (yeast)                    | 0.21  | 0.048 |
| 11731831_x_at | DHDPSL       | dihydrodipicolinate synthase-like, mitochondrial                                | 0.28  | 0.048 |
| 11723707_a_at | AIFM2        | apoptosis-inducing factor, mitochondrion-associated, 2                          | 0.34  | 0.048 |
| 11754487_x_at | C5orf33      | chromosome 5 open reading frame 33                                              | 0.36  | 0.048 |
| 11723467_a_at | NDUFA3       | NADH dehydrogenase (ubiquinone) 1 alpha subcomplex, 3, 9kDa                     | 0.18  | 0.049 |
| 11754240_a_at | MRPS5        | mitochondrial ribosomal protein S5                                              | 0.23  | 0.049 |
| 11748456_a_at | MCF2L        | MCF.2 cell line derived transforming sequence-like                              | -0.26 | 0.049 |
| 11718685_a_at | TXNRD2       | thioredoxin reductase 2                                                         | -0.85 | 0.050 |

|               |         |                                   |       |       |
|---------------|---------|-----------------------------------|-------|-------|
| 11731082_at   | RNF144B | ring finger protein 144B          | -0.50 | 0.050 |
| 11717296_s_at | LRPPRC  | leucine-rich PPR-motif containing | -0.34 | 0.050 |
| 11726975_x_at | PERP    | PERP, TP53 apoptosis effector     | 0.29  | 0.050 |

**Supplementary Table S3: Significantly altered genes (nominal p<0.05) associated with glucose metabolism based on KEGG glycolysis/gluconeogenesis gene set.**

| ID            | Gene Symbol | Gene Title                                      | Log2 FC | P-Value |
|---------------|-------------|-------------------------------------------------|---------|---------|
| 11754184_a_at | ALDH1A3     | aldehyde dehydrogenase 1 family, member A3      | -0.93   | 0.003   |
| 11751154_x_at | ALDOC       | aldolase C, fructose-bisphosphate               | -0.47   | 0.008   |
| 11752103_a_at | HK1         | hexokinase 1                                    | -0.49   | 0.010   |
| 11718291_a_at | HK1         | hexokinase 1                                    | -0.47   | 0.011   |
| 11748423_a_at | PGM1        | phosphoglucomutase 1                            | -0.65   | 0.011   |
| 11756127_a_at | PGM1        | phosphoglucomutase 1                            | -0.69   | 0.012   |
| 11731491_a_at | HK1         | hexokinase 1                                    | -0.46   | 0.013   |
| 11747079_x_at | ALDOC       | aldolase C, fructose-bisphosphate               | -0.43   | 0.014   |
| 11718292_s_at | HK1         | hexokinase 1                                    | -0.44   | 0.016   |
| 11751153_a_at | ALDOC       | aldolase C, fructose-bisphosphate               | -0.35   | 0.018   |
| 11724462_x_at | ALDOC       | aldolase C, fructose-bisphosphate               | -0.43   | 0.021   |
| 11753466_a_at | ACSS2       | acyl-CoA synthetase short-chain family member 2 | -0.95   | 0.021   |
| 11730931_at   | ACSS3       | acyl-CoA synthetase short-chain family member 3 | 0.34    | 0.024   |
| 11724461_a_at | ALDOC       | aldolase C, fructose-bisphosphate               | -0.47   | 0.025   |
| 11752342_x_at | PKM2        | pyruvate kinase, muscle                         | -0.26   | 0.032   |
| 11744437_a_at | ADH6        | alcohol dehydrogenase 6 (class V)               | 0.30    | 0.034   |
| 11752166_x_at | PKM2        | pyruvate kinase, muscle                         | -0.35   | 0.036   |
| 11759049_at   | ACSS3       | acyl-CoA synthetase short-chain family member 3 | 0.31    | 0.038   |

**Supplementary Table S4: Overlap between significantly decreased genes (nominal p<0.05) and the molecular signature database C3 (motif) gene set.**

| Gene Set Name<br>[# Genes (K)]                                       | Description                                                                                                                      | # Genes<br>in<br>Overlap<br>(k) | p-value               | FDR<br>q-value        |
|----------------------------------------------------------------------|----------------------------------------------------------------------------------------------------------------------------------|---------------------------------|-----------------------|-----------------------|
| CAGGTG_V\$E12_Q6<br>[2485]                                           | motif CAGGTG which matches TCF3: transcription factor 3 (E2A immunoglobulin enhancer binding factors E12/E47)                    | 228                             | 4.68 e <sup>-65</sup> | 3.91 e <sup>-62</sup> |
| GGGCGGR_V\$SP1_Q6[2<br>940]                                          | SP1: Sp1 transcription factor                                                                                                    | 213                             | 9.41 e <sup>-44</sup> | 3.93 e <sup>-41</sup> |
| AACTTT_UNKNOWN<br>[1890]                                             | motif AACTTT. Motif does not match any known transcription factor                                                                | 165                             | 1.42 e <sup>-43</sup> | 3.96 e <sup>-41</sup> |
| TGGAAA_V\$NFAT_Q4_0<br>1 [1896]                                      | motif TGGAAA which matches NFAT<br>NFATC                                                                                         | 163                             | 3.48 e <sup>-42</sup> | 7.27 e <sup>-40</sup> |
| TGANTCA_V\$AP1_C<br>[1121]                                           | motif TGANTCA which matches JUN: jun oncogene                                                                                    | 114                             | 4.59 e <sup>-36</sup> | 7.67 e <sup>-34</sup> |
| GGGAGGRR_V\$MAZ_Q6<br>[2274]                                         | motif GGGAGGRR which matches MAZ: MYC-associated zinc finger protein (purine-binding transcription factor)                       | 167                             | 1.11 e <sup>-34</sup> | 1.55 e <sup>-32</sup> |
| CTTTGT_V\$LEF1_Q2<br>[1972]                                          | motif CTTTGT which matches LEF1: lymphoid enhancer-binding factor 1                                                              | 150                             | 9.36 e <sup>-33</sup> | 1.12 e <sup>-30</sup> |
| TTGTTT_V\$FOXO4_01<br>[2061]                                         | motif TTGTTT which matches MLLT7: myeloid/lymphoid or mixed-lineage leukemia (trithorax homolog, Drosophila); translocated to, 7 | 149                             | 3.68 e <sup>-30</sup> | 3.85 e <sup>-28</sup> |
| CAGCTG_V\$AP4_Q5<br>[1524]                                           | motif CAGCTG which matches REPIN1: replication initiator 1                                                                       | 122                             | 1.21 e <sup>-28</sup> | 1.13 e <sup>-26</sup> |
| RYTTCCTG_V\$ETS2_B<br>[1085]                                         | motif RYTTCCTG which matches ETS2: v-ets erythroblastosis virus E26 oncogene homolog 2 (avian)                                   | 97                              | 1.97 e <sup>-26</sup> | 1.65 e <sup>-24</sup> |
| TGTTTAC,MIR-30A-5P,<br>MIR-30C,MIR-30D, MIR-<br>30B,MIR-30E-5P [579] | Targets of MicroRNA TGTTTAC,MIR-30A-5P,MIR-30C,MIR-30D,MIR-30B,MIR-30E-5P                                                        | 65                              | 2.94 e <sup>-23</sup> | 2.24 e <sup>-21</sup> |
| GGGTGGRR_V\$PAX4_03<br>[1294]                                        | motif GGGTGGRR which matches PAX4: paired box gene 4                                                                             | 101                             | 5.41 e <sup>-23</sup> | 3.67 e <sup>-21</sup> |
| CAGTATT,MIR-200B,MIR-<br>200C,MIR-429 [469]                          | Targets of MicroRNA CAGTATT,MIR-200B,MIR-200C,MIR-429                                                                            | 58                              | 5.7 e <sup>-23</sup>  | 3.67 e <sup>-21</sup> |
| TTANTCA_UNKNOWN<br>[952]                                             | motif TTANTCA. Motif does not match any known transcription factor                                                               | 84                              | 1.23 e <sup>-22</sup> | 7.33 e <sup>-21</sup> |
| TTGCAC,MIR-19A,MIR-<br>19B [516]                                     | Targets of MicroRNA TTTGCAC,MIR-19A,MIR-19B                                                                                      | 60                              | 2.44 e <sup>-22</sup> | 1.36 e <sup>-20</sup> |
| GCANCTGNY_V\$MYOD_<br>Q6 [924]                                       | motif GCANCTGNY which matches MYOD1: myogenic differentiation 1                                                                  | 82                              | 2.79 e <sup>-22</sup> | 1.46 e <sup>-20</sup> |
| GTGCCTT,MIR-506 [727]                                                | Targets of MicroRNA GTGCCTT,MIR-506                                                                                              | 71                              | 9.18 e <sup>-22</sup> | 4.52 e <sup>-20</sup> |
| CTTTGA_V\$LEF1_Q2<br>[1232]                                          | motif CTTTGA which matches LEF1: lymphoid enhancer-binding factor 1                                                              | 95                              | 2.6 e <sup>-21</sup>  | 1.21 e <sup>-19</sup> |
| TGCCTTA,MIR-124A<br>[552]                                            | Targets of MicroRNA TGCCTTA,MIR-124A                                                                                             | 59                              | 3.56 e <sup>-20</sup> | 1.57 e <sup>-18</sup> |
| WGGAATGY_V\$TEF1_Q6<br>[378]                                         | motif WGGAATGY which matches TEAD1: TEA domain family member 1 (SV40 transcriptional enhancer factor)                            | 47                              | 5.84 e <sup>-19</sup> | 2.44 e <sup>-17</sup> |
| TATAAA_V\$TATA_01<br>[1296]                                          | motif TATAAA which matches TAF TATA                                                                                              | 93                              | 8.23 e <sup>-19</sup> | 3.27 e <sup>-17</sup> |
| CTGCAGY_UNKNOWN<br>[765]                                             | motif CTGCAGY. Motif does not match any known transcription factor                                                               | 67                              | 4.07 e <sup>-18</sup> | 1.55 e <sup>-16</sup> |
| TGGNNNNNNKCCAR_UN<br>KNOWN [424]                                     | motif TGGNNNNNNKCCAR. Motif does not match any known transcription factor                                                        | 48                              | 1.16 e <sup>-17</sup> | 4.23 e <sup>-16</sup> |

|                                                                                |                                                                                                                            |    |                       |                       |
|--------------------------------------------------------------------------------|----------------------------------------------------------------------------------------------------------------------------|----|-----------------------|-----------------------|
| GGGYGTGNY_UNKNOW<br>N [664]                                                    | motif GGGYGTGNY. Motif does not match any known transcription factor                                                       | 61 | 1.38 e <sup>-17</sup> | 4.81 e <sup>-16</sup> |
| ACTGTGA,MIR-27A,MIR-<br>27B [474]                                              | Targets of MicroRNA ACTGTGA,MIR-27A,MIR-27B                                                                                | 50 | 4.63 e <sup>-17</sup> | 1.55 e <sup>-15</sup> |
| RGAGGAARY_V\$PU1_Q6<br>[502]                                                   | motif RGAGGAARY which matches SPI1: spleen focus forming virus (SFFV) proviral integration oncogene spi1                   | 51 | 1.08 e <sup>-16</sup> | 3.46 e <sup>-15</sup> |
| TGACCTY_V\$ERR1_Q2<br>[1043]                                                   | motif TGACCTY which matches ESRR1: estrogen-related receptor alpha                                                         | 77 | 1.99 e <sup>-16</sup> | 6.17 e <sup>-15</sup> |
| TAGCTTT,MIR-9 [236]                                                            | Targets of MicroRNA TAGCTTT,MIR-9                                                                                          | 34 | 4.92 e <sup>-16</sup> | 1.39 e <sup>-14</sup> |
| TGGTGCT,MIR-29A,MIR-<br>29B,MIR-29C [521]                                      | Targets of MicroRNA TGGTGCT,MIR-29A,MIR-29B,MIR-29C                                                                        | 51 | 4.96 e <sup>-16</sup> | 1.39 e <sup>-14</sup> |
| TGCACTT,MIR-519C,MIR-<br>519B,MIR-519A [448]                                   | Targets of MicroRNA TGCACTT,MIR-519C,MIR-519B,MIR-519A                                                                     | 47 | 5 e <sup>-16</sup>    | 1.39 e <sup>-14</sup> |
| YTATTTTNR_V\$MEF2_02<br>[697]                                                  | motif YTATTTTNR which matches MEF2A: MADS box transcription enhancer factor 2, polypeptide A (myocyte enhancer factor 2A)  | 60 | 5.18 e <sup>-16</sup> | 1.4 e <sup>-14</sup>  |
| TGCCAAR_V\$NF1_Q6<br>[722]                                                     | motif TGCCAAR which matches NF1: neurofibromin 1 (neurofibromatosis, von Recklinghausen disease, Watson disease)           | 61 | 6.98 e <sup>-16</sup> | 1.82 e <sup>-14</sup> |
| TGACAGNY_V\$MEIS1_01<br>[827]                                                  | motif TGACAGNY which matches MEIS1: Meis1, myeloid ecotropic viral integration site 1 homolog (mouse)                      | 66 | 7.29 e <sup>-16</sup> | 1.85 e <sup>-14</sup> |
| GCACTTT,MIR-17-5P,<br>MIR-20A,MIR-106A,<br>MIR-106B,MIR-20B,MIR-<br>519D [595] | Targets of MicroRNA GCACTTT,MIR-17-5P,MIR-20A,MIR-106A,MIR-106B,MIR-20B,MIR-519D                                           | 54 | 1.7 e <sup>-15</sup>  | 4.18 e <sup>-14</sup> |
| CTTTAAR_UNKNOWN<br>[972]                                                       | motif CTTTAAR. Motif does not match any known transcription factor                                                         | 71 | 5.22 e <sup>-15</sup> | 1.25 e <sup>-13</sup> |
| TGAATGT,MIR-181A,<br>MIR-181B,MIR-181C,<br>MIR-181D [484]                      | Targets of MicroRNA TGAATGT,MIR-181A,MIR-181B,MIR-181C,MIR-181D                                                            | 47 | 9.47 e <sup>-15</sup> | 2.2 e <sup>-13</sup>  |
| TAATTA_V\$CHX10_01<br>[810]                                                    | motif TAATTA which matches VSX1: visual system homeobox 1 homolog, CHX10-like (zebrafish)                                  | 63 | 1.1 e <sup>-14</sup>  | 2.48 e <sup>-13</sup> |
| TTGCCAA,MIR-182 [327]                                                          | Targets of MicroRNA TTGCCAA,MIR-182                                                                                        | 38 | 1.23 e <sup>-14</sup> | 2.69 e <sup>-13</sup> |
| TGACATY_UNKNOWN<br>[665]                                                       | motif TGACATY. Motif does not match any known transcription factor                                                         | 56 | 1.26 e <sup>-14</sup> | 2.69 e <sup>-13</sup> |
| GGATTA_V\$PITX2_Q2<br>[587]                                                    | motif GGATTA which matches PITX2: paired-like homeodomain transcription factor 2                                           | 52 | 1.51 e <sup>-14</sup> | 3.15 e <sup>-13</sup> |
| V\$ER_Q6_02 [252]                                                              | motif NAGGTCANNY which matches ESR1: estrogen receptor 1                                                                   | 32 | 1.3 e <sup>-13</sup>  | 2.65 e <sup>-12</sup> |
| V\$SRF_C [211]                                                                 | motif DCCWTATATGGNCWN which matches SRF: serum response factor (c-fos serum response element-binding transcription factor) | 29 | 2.37 e <sup>-13</sup> | 4.72 e <sup>-12</sup> |
| V\$AMEF2_Q6 [259]                                                              | motif CKGDYTAATAACACMM. Motif does not match any known transcription factor                                                | 32 | 2.79 e <sup>-13</sup> | 5.42 e <sup>-12</sup> |
| AAGCACA,MIR-218 [398]                                                          | Targets of MicroRNA AAGCACA,MIR-218                                                                                        | 40 | 3.06 e <sup>-13</sup> | 5.82 e <sup>-12</sup> |
| V\$AP1_Q6_01 [264]                                                             | motif NTGACTCAN which matches JUN: jun oncogene                                                                            | 32 | 4.73 e <sup>-13</sup> | 8.8 e <sup>-12</sup>  |
| CAGCTTT,MIR-320 [256]                                                          | Targets of MicroRNA CAGCTTT,MIR-320                                                                                        | 31 | 1.12 e <sup>-12</sup> | 2.04 e <sup>-11</sup> |
| RNGTGGGC_UNKNOWN<br>[766]                                                      | motif RNGTGGGC. Motif does not match any known transcription factor                                                        | 57 | 1.26 e <sup>-12</sup> | 2.24 e <sup>-11</sup> |
| WTGAAAT_UNKNOWN<br>[616]                                                       | motif WTGAAAT. Motif does not match any known transcription factor                                                         | 50 | 1.31 e <sup>-12</sup> | 2.29 e <sup>-11</sup> |
| V\$AP1_C [275]                                                                 | motif NTGASTCAG which matches JUN: jun oncogene                                                                            | 32 | 1.45 e <sup>-12</sup> | 2.47 e <sup>-11</sup> |
| ACCAAAG,MIR-9 [499]                                                            | Targets of MicroRNA ACCAAAG,MIR-9                                                                                          | 44 | 1.87 e <sup>-12</sup> | 3.08 e <sup>-11</sup> |



**Supplementary Table S5: Significantly altered genes (nominal  $p < 0.05$ ) in or associated with the p53 family.**

| <b>Id</b>     | <b>Gene Symbol</b> | <b>Gene Title</b>                              | <b>Log2 FC</b> | <b>P-Value</b> |
|---------------|--------------------|------------------------------------------------|----------------|----------------|
| 11749789_a_at | TP53I3             | tumor protein p53 inducible protein 3          | 0.47           | 0.02           |
| 11735724_a_at | TP53BP1            | tumor protein p53 binding protein 1            | 0.70           | 0.02           |
| 11752567_a_at | TP63               | tumor protein p63                              | -0.24          | 0.02           |
| 11736193_a_at | RRM2B              | ribonucleotide reductase M2 B (TP53 inducible) | -0.49          | 0.02           |
| 11736192_at   | RRM2B              | ribonucleotide reductase M2 B (TP53 inducible) | -0.41          | 0.02           |
| 11718808_a_at | TP53BP1            | tumor protein p53 binding protein 1            | 0.62           | 0.03           |
| 11735725_x_at | TP53BP1            | tumor protein p53 binding protein 1            | 0.64           | 0.03           |
| 11736821_x_at | TP73               | tumor protein p73                              | -0.24          | 0.03           |
| 11754177_a_at | RRM2B              | ribonucleotide reductase M2 B (TP53 inducible) | -0.36          | 0.04           |
| 11726975_x_at | PERP               | PERP, TP53 apoptosis effector                  | 0.29           | 0.05           |
| 11751537_x_at | TP53               | tumor protein p53                              | 0.23           | 0.05           |

**Supplementary Table S6: Official gene symbols and names with primer sequences used for qRT-PCR.**

| Gene Symbol     | Gene Name                                                                                            | Forward Primer 5'-3'     | Reverse Primer 5'-3'      |
|-----------------|------------------------------------------------------------------------------------------------------|--------------------------|---------------------------|
| <i>ACTB</i>     | actin, beta                                                                                          | CATGTACGTTGCTATCCAGGC    | CTCCTTAATGTCACGCACGAT     |
| <i>ALDOA</i>    | aldolase A, fructose-bisphosphate                                                                    | GGCCATGCTTGCACTCAGAAGTTT | AATGGCATTGAGGTTGATGGACGC  |
| <i>ATP5A1</i>   | ATP synthase, H <sup>+</sup> transporting, mitochondrial F1 complex, alpha subunit 1, cardiac muscle | TGCAAGGAACCTCCATGCCTC    | CGCCCAGTTTCTCAAGATCAA     |
| <i>CAT</i>      | catalase                                                                                             | TGGGATCTCGTTGAAATAACAC   | TCAGGACGTAGGCTCCAGAAG     |
| <i>CYC1</i>     | cytochrome c-1                                                                                       | CTTCGCGGGGTAGTGTGG       | GGCCAGACTTCGACGACAA       |
| <i>CYCS</i>     | cytochrome c, somatic                                                                                | CTTTGGGCGGAAGACAGGTC     | TTATTGGCGGCTGTGTAAGAG     |
| <i>DNM1L</i>    | dynamins 1-like                                                                                      | TCACCCGGAGACCTCTCATT     | TCTTCTGCTTCCACCCATT       |
| <i>E2F1</i>     | E2F transcription factor 1                                                                           | GGCCGCCATCCAGGAAAAGGTG   | GACGACACCGTCAGCCGAGT      |
| <i>E2F4</i>     | E2F transcription factor 4, p107/p130-binding                                                        | CACCACCAAGTTCGTGTCCC     | GCGTACAGCTAGGGTGTCA       |
| <i>ESRRA</i>    | estrogen-related receptor alpha                                                                      | AAGACAGCAGCCCCAGTGAA     | ACACCCAGCACCAGCACCT       |
| <i>ESRRG</i>    | estrogen-related receptor gamma                                                                      | GCCCTACTACACTGTGTGAC     | CCTGCTAATTTGGACTGGTCTT    |
| <i>FIS1</i>     | fission, mitochondrial 1                                                                             | GTGGAGGACCTGCTGAAGTTT    | GCACGATGCCTTTACGGATG      |
| <i>GABPA</i>    | GA binding protein transcription factor alpha subunit                                                | AGGAAGTGGAGGGACTGATCC    | GGCGCGTAGGTTTGTCTAC       |
| <i>GABPB1</i>   | GA binding protein transcription factor, beta subunit 1                                              | TGCCAGATGGACAACAAGTATT   | GCAAAGCACACCCGGGTAATA     |
| <i>GABPB2</i>   | GA binding protein transcription factor, beta subunit 2                                              | AATCTTACTCGCGGCGCCTT     | CAAAGACATCTCCTCGTCCGGG    |
| <i>GAPDH</i>    | glyceraldehyde-3-phosphate dehydrogenase                                                             | CCAGGGCTGCTTTTAACTC      | GCTCCCCCTGCAAATGA         |
| <i>GPX1</i>     | glutathione peroxidase 1                                                                             | TATCGAGAATGTGGCGTCCC     | TCTTGGCGTTCTCCTGATGC      |
| <i>HK1</i>      | hexokinase 1                                                                                         | CCAACATTCGTAAGGTCCATTCC  | CCTCGGACTCCATGTGAACATT    |
| <i>HK2</i>      | hexokinase 2                                                                                         | GAGCCACCACTCACCCTACT     | CCAGGCATTCGGCAATGTG       |
| <i>INF2</i>     | inverted formin, FH2 and WH2 domain containing                                                       | CTCACCGGCTCGGCAAGAT      | GCCGGAGTAGTTGACCACAG      |
| <i>MFF</i>      | mitochondrial fission factor                                                                         | TGACCACGAACACTCTTCCG     | GTGCTGGATTGAGAGCCACT      |
| <i>MFN1</i>     | mitofusin 1                                                                                          | GCCTCCTCTCCGCTTTAAC      | TATGCTAAGTCTCCGCTCCAA     |
| <i>MFN2</i>     | mitofusin 2                                                                                          | GAGGCGTAAGGAGTAGGCGG     | AGGGACATTGCGCTTCACCT      |
| <i>MIEF1</i>    | mitochondrial elongation factor 1                                                                    | AACGGCAAATTGGGGAGGAT     | GCCATTGCTCATCTGAGGCT      |
| <i>mt-ND1</i>   | mitochondrially encoded NADH dehydrogenase 1                                                         | ATGGCCAACCTCCTACTCCTCATT | TTATGGCGTCAGCGAAGGGTTGTA  |
| <i>mt-ND2</i>   | mitochondrially encoded NADH dehydrogenase 2                                                         | CCATCTTTGCAGGCACACTCATCA | ATTATGGATGCGGTTGCTTGCCTG  |
| <i>NDUFV1</i>   | NADH:ubiquinone oxidoreductase core subunit V1                                                       | AGGATGAAGACCGGATTTTCAC   | CAGTCACCTCGACTCAGGGA      |
| <i>OPA1</i>     | optic atrophy 1 (autosomal dominant)                                                                 | TGGTCTAACAAGCTCTCAGTGTGG | ACCGGTTGACCATGGAGTACAACCT |
| <i>PKM2</i>     | pyruvate kinase, muscle isoform a                                                                    | AAGGACCTGAGATCCGAACTG    | GCGTTATCCAGCGTGATTTTGA    |
| <i>PPARGC1A</i> | peroxisome proliferator-activated receptor gamma, coactivator 1 alpha                                | TCTGAGTCTGTATGGAGTGACAT  | CCAAGTCGTTACATCTAGTTCA    |
| <i>PPARGC1B</i> | peroxisome proliferator-activated receptor gamma, coactivator 1 beta                                 | GATGCCAGCGACTTTGACTC     | ACCCACGTCATCTTCAGGGA      |
| <i>PPRC1</i>    | peroxisome proliferator-activated receptor gamma, coactivator-related 1                              | CAAGCGCCGATGGGACTTT      | GGAGGCATCCATGTAGCTCT      |
| <i>RB1</i>      | retinoblastoma 1                                                                                     | CCTCATGCTGTTTCAGGAGACAT  | GGCTTCGAGGAATGTGAGGT      |
| <i>SDHA</i>     | succinate dehydrogenase complex subunit A, flavoprotein (Fp)                                         | CAAACAGGAACCCGAGGTTTT    | CAGCTTGGAACACATGCTGTAT    |
| <i>SIRT1</i>    | sirtuin 1                                                                                            | AGCTAGGACCATTACTGCCAGAGA | AGCACACAAACATCATGCAAATGG  |
| <i>SIRT2</i>    | sirtuin 2                                                                                            | TCATGGGTACCTCCTTGACAG    | CTCCAGCTCCTTCTCCATCC      |
| <i>SIRT3</i>    | sirtuin 3                                                                                            | ACCCAGTGGCATTCCAGAC      | GGCTTGGGGTTGTGAAAGAAG     |
| <i>SLC2A1</i>   | solute carrier family 2 (facilitated glucose transporter), member 1                                  | GGCCAAGAGTGTGCTAAAGAA    | ACAGCGTTGATGCCAGACAG      |
| <i>SLC2A4</i>   | solute carrier family 2 (facilitated glucose transporter), member 4                                  | GTCGGGCTTCCAACAGATAG     | AGCACCGCAGAGAACACAG       |
| <i>SOD1</i>     | superoxide dismutase 1, soluble                                                                      | GGTGGGCAAAGGATGAAGAG     | CCACAAGCCAAACGACTTCC      |
| <i>SOD2</i>     | superoxide dismutase 2, mitochondrial                                                                | GGAAGCCATCAAACGTGACTT    | CCGTTTCTTATTGAAACCAAGC    |
| <i>SP1</i>      | transcription factor SP1                                                                             | GGTTCGCTTGCCTCGTCAG      | GGAGTGATCTTGGTCGCTCAT     |
| <i>TFAM</i>     | transcription factor A, mitochondrial                                                                | AACACTGCTTGGAAAACAAA     | CAGCTTTTCTGCGGTGAAT       |
| <i>UCP1</i>     | uncoupling protein 1 (mitochondrial, proton carrier)                                                 | AGCGGCAAATCAGCTCCGCC     | ACGACCTCTGTGGGTTGCC       |
| <i>YY1</i>      | YY1 transcription factor                                                                             | GCTTGCCCTCATAAAGGCTG     | ACATTCTGCACAGACGTGGA      |
